# Supplementary material for: Multifunctional rGO/Y 2 O 3 @hydroxyapatite bioceramics: structural, optical, and biomedical properties
Source: Royal Society of Chemistry journal article supplement (doi:10.1039/d5ra08618c), 2026-01-01
Supplement: d5ra08618c1.pdf [file d5ra08618c1.pdf]

Supplementary Information

## Multifunctional rGO/Y<sub>2</sub>O<sub>3</sub>@Hydroxyapatite Bioceramics: Structural, Optical, and Biomedical Properties

Elbadawy A. Kamoun<sup>1,2\*</sup>, Asmaa Elawadly<sup>2</sup>, Merna H. Emam<sup>3</sup>, Shahira H. EL-Moslamy<sup>4</sup>, Asmaa M. Elzayat<sup>2</sup>, E. M. Abdelrazek<sup>2</sup>, Mohammed Sallah<sup>5</sup>, Jong Yeog Son<sup>6\*</sup>, and Ahmed I. Ali<sup>7,8\*</sup>

<sup>1</sup>Department of Chemistry, College of Science, King Faisal University, Al-Ahsa 31982, Saudi Arabia.

<sup>2</sup>Physics Department, Faculty of Science, Mansoura University, Mansoura 35516, Egypt.

<sup>3</sup>Nanotechnology Research Center (NTRC), The British University in Egypt, El-Shorouk City, Suez Desert Road, P.O. Box 43, Cairo 11837, Egypt.

<sup>4</sup>Bioprocess Development Department (BID), Genetic Engineering and Biotechnology Research Institute (GEBRI), City of Scientific Research and Technological Applications (SRTA-City), New Borg El-Arab City, Alexandria 21934, Egypt.

<sup>5</sup>Department of Physics, College of Sciences, University of Bisha, P.O. Box 344, Bisha 61922, Saudi Arabia.

<sup>6</sup>Department of Applied Physics and Institute of Natural Sciences, College of Applied Science, Kyung Hee University, Suwon 446-701, Republic of Korea

<sup>7</sup>Basic Science Department, Faculty of Technology and Education, Helwan University, Saray-El Qoupa, El Sawah St., 11281 Cairo, Egypt.

<sup>8</sup>Department of Mechanical Engineering (Integrated Engineering Program), Kyung Hee University, 1732 Deogyong-daero, Yongin, Gyeonggi, 17104, South Korea.

\*Corresponding authors: (E. A. Kamoun: [ekamoun@kfu.edu.sa](mailto:ekamoun@kfu.edu.sa), [badawykamoun@yahoo.com](mailto:badawykamoun@yahoo.com), Tel: +201283320302, (Jong Yeog Son; [jyson@khu.ac.kr](mailto:jyson@khu.ac.kr)) (Ahmed I. Ali: [ahmed\\_ali\\_2010@techedu.helwan.edu.eg](mailto:ahmed_ali_2010@techedu.helwan.edu.eg), [ahmedalikh2024@khu.ac.kr](mailto:ahmedalikh2024@khu.ac.kr)).

### - Particle size analysis of rGO/Y<sub>2</sub>O<sub>3</sub>@Hap composites

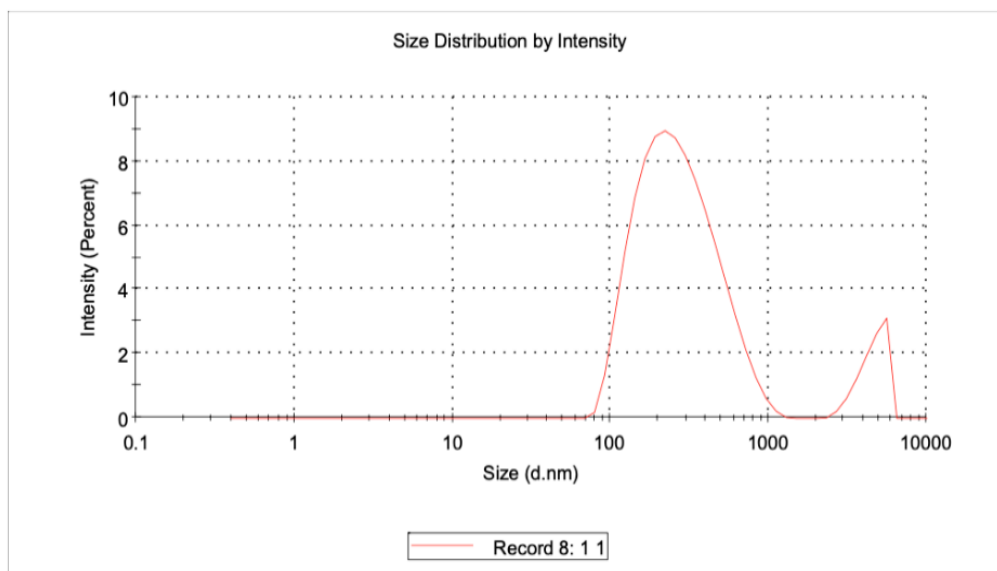

**Fig. S1** Zeta size of composite coded AA1.

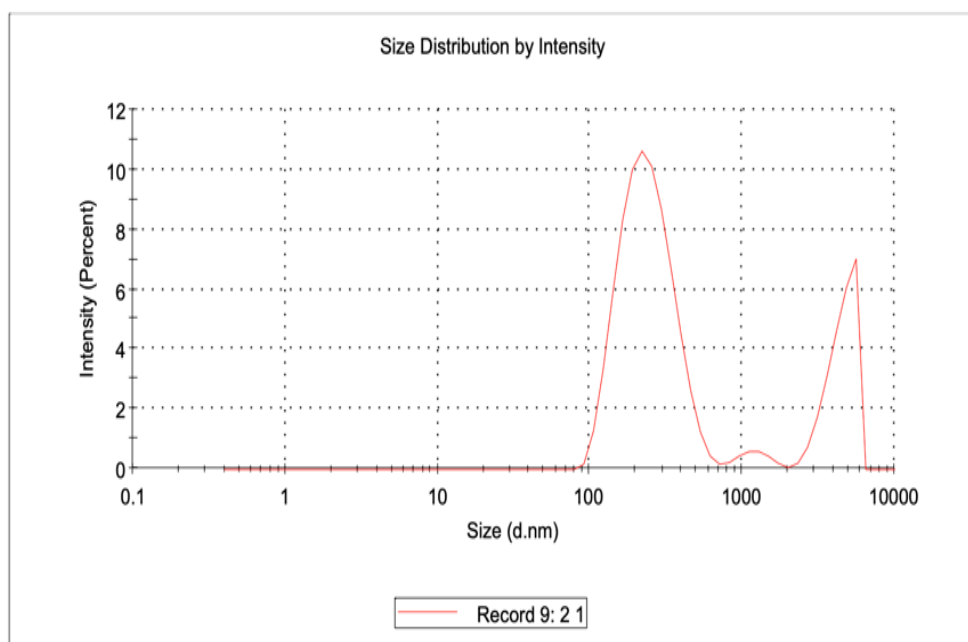

**Fig. S2** Zeta size to of composite coded AA2.

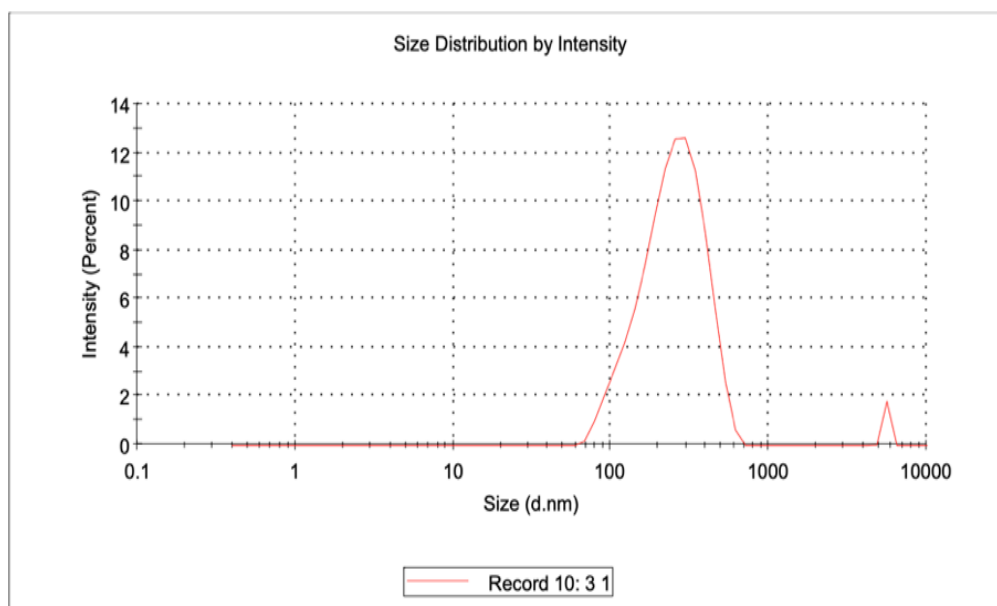

**Fig. S3** Zeta size to of composite coded AA3.

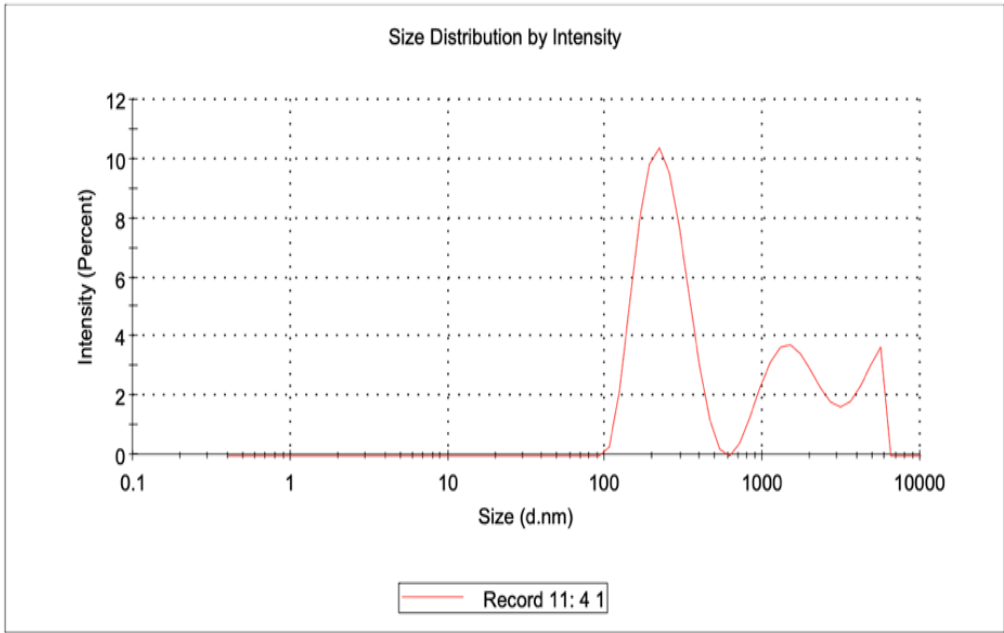

Fig. S4 Zeta size to of composite coded AA4.

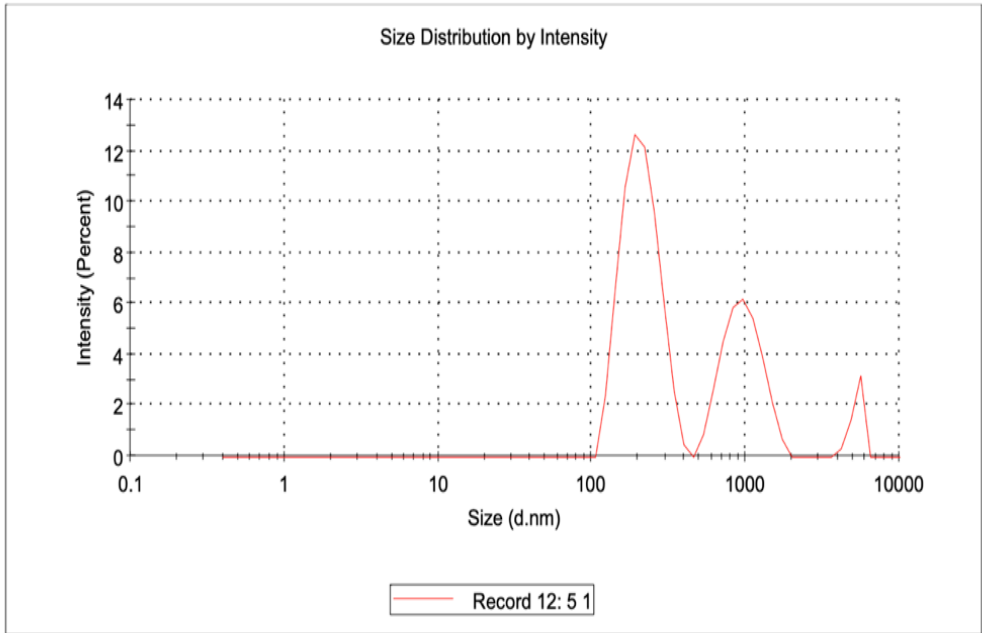

Fig. S5 Zeta size to of composite coded AA5.
